# Supplementary material for: Par3 integrates Tiam1 and phosphatidylinositol 3-kinase signaling to change apical membrane identity
Source: PubMed Central journal article supplement — Mol Biol Cell. 2017 Jan 15;28(2):252–60. doi: 10.1091/mbc.E16-07-0541 (PMC5231894; doi:10.1091/mbc.e16-07-0541), 2017-01-15
Supplement: supp_E16-07-0541v1_CombinedSupMats.pdf [file supp_E16-07-0541v1_CombinedSupMats.pdf]

# Supplemental Materials

*Molecular Biology of the Cell*

Ruch et al.

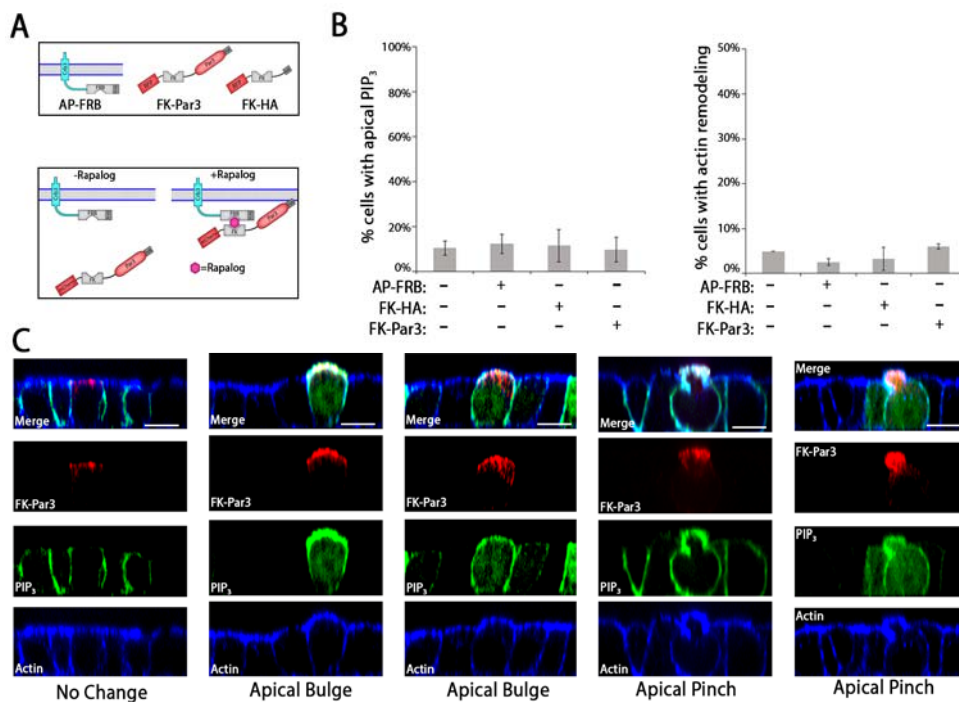

**Figure S1. Expression of**

**CID constructs and images of apical membrane remodeling. (A)** Diagram depicting the constructs and CID strategy. Rapalog addition induces apical localization of FK-Par3 and FK-HA. **(B)** Quantitation of apical PIP<sub>3</sub> and actin rearrangement in cells expressing the indicated constructs. Error bars=SEM. P-value determined by one-way ANOVA followed by post-hoc Tukey's test. N=3. Scale bar=10 μm. **(C)** Representative single XZ slice from confocal micrograph of MDCK cells expressing PH-Akt-GFP (PIP<sub>3</sub>, green) transfected with AP-FRB and AP-Par3 (red) and then treated with 200 nM Rapalog (+Rapa) for 60 mins. Shown are examples of the various actin (blue) rearrangement morphologies that were scored as "positive", including apical bulge and apical pinch.

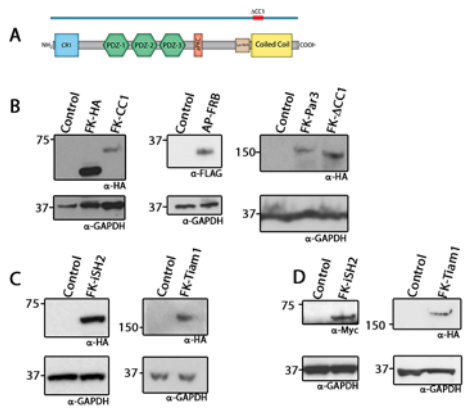

**Figure S2. Par3 diagram and Western blots of CID constructs. (A)** Diagram of the major domains of Par3. The  $\Delta$ CC1 deletion is denoted in red. **(B-E)** Western blot of untransfected MDCK cells (control) or cells individually transfected with the indicated constructs. GAPDH serves as a loading control. Molecular weight markers are indicated. FK constructs were detected using an anti-HA antibody. For **(E)**, FK-iSH2 was detected using a Myc antibody and FK-Tiam1 was detected using an HA antibody.

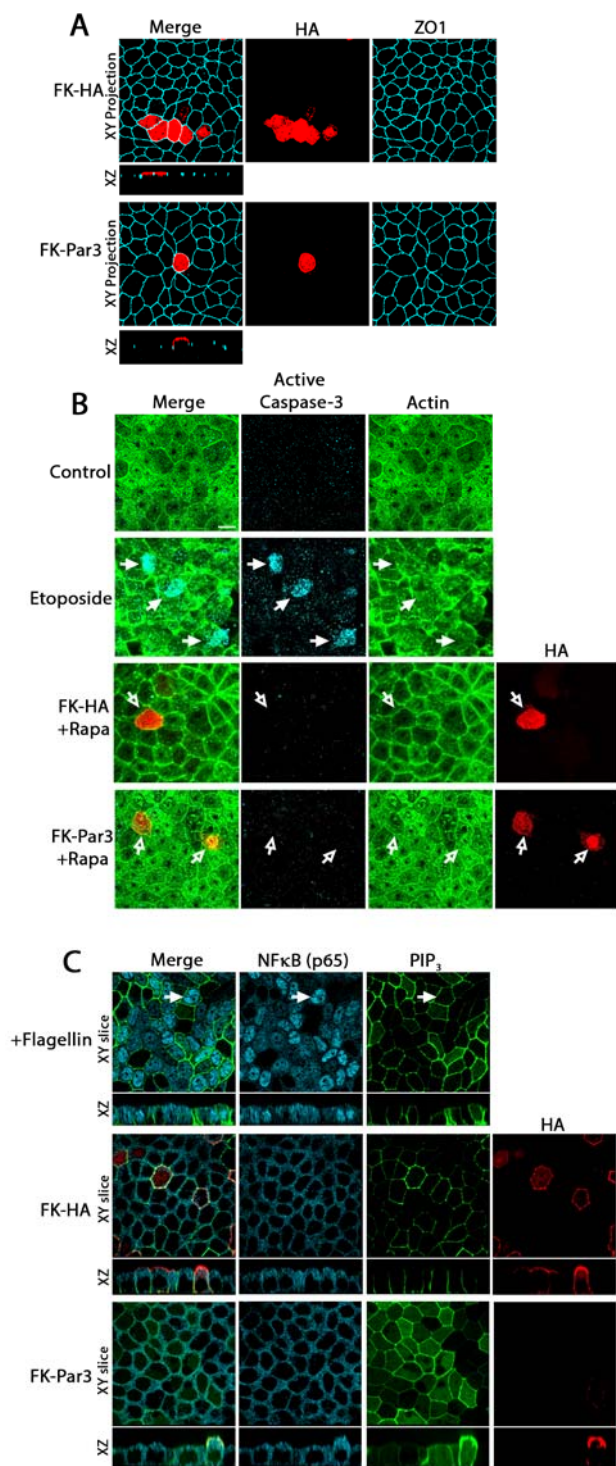

**Figure S3. Apical membrane remodeling does not affect tight junctions, induce apoptosis, or activate NFκB. (A)** Confocal XZ slice and max intensity XY projections of MDCK cells expressing AP-FRB and either FK-HA or FK-Par3 (red, HA) 60 mins after treatment with 200nM Rapalag. The tight junction protein ZO1 is shown in cyan. **(B)** Max intensity XY projections of MDCK cells that were untransfected

(control), treated with 500  $\mu$ M etoposide for 3 hours, or that were transfected with AP-FRB and either FK-HA or FK-Par3 and then treated for 60 mins with 200nM Rapalog. Cells were stained for activated caspase-3 (cyan), actin (green, phalloidin), and HA (red). White arrows indicate cells with activated caspase-3. Transparent arrows indicate transfected cells expressing FK-HA or FK-Par3. **(C)** MDCK cells expressing PH-Akt-GFP (green) were treated with purified 200 ng/ml *P. aeruginosa* flagellin for 60 mins or were transfected with AP-FRB and either FK-HA or FK-Par3 and treated with Rapalog for 60 mins. Arrows point to a cell with nuclear NF $\kappa$ B. Shown are XZ and XY slices stained for NF $\kappa$ B (cyan, p65), and HA (red). Scale bar=10  $\mu$ m.
